# Supplementary material for: Cell-penetrating peptides containing the progesterone receptor polyproline domain inhibits EGF signaling and cell proliferation in lung cancer cells
Source: PubMed Central journal article supplement (PMC8890653; doi:10.1371/journal.pone.0264717), 2022-03-02

**Figure 1C**

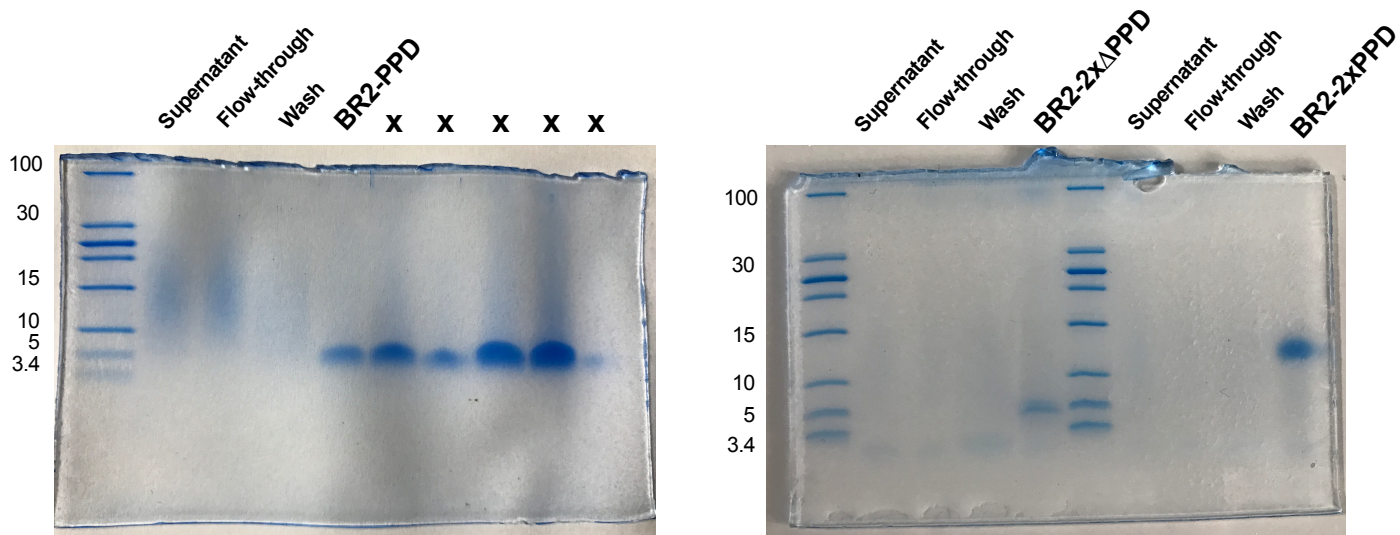

**Figure 1D**

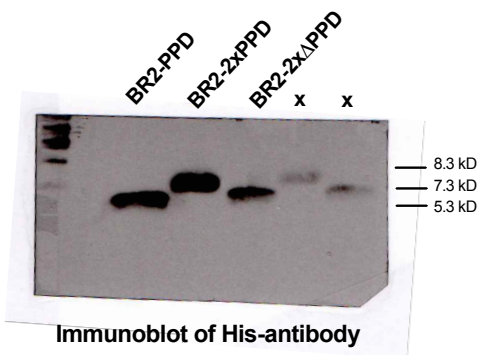

**Figure 2C**

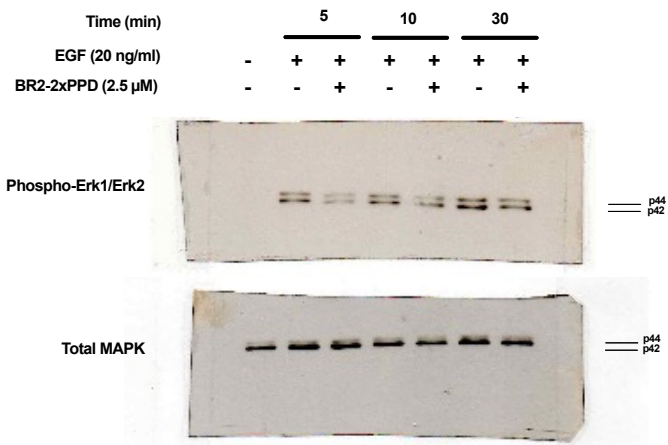

**Figure 2D**

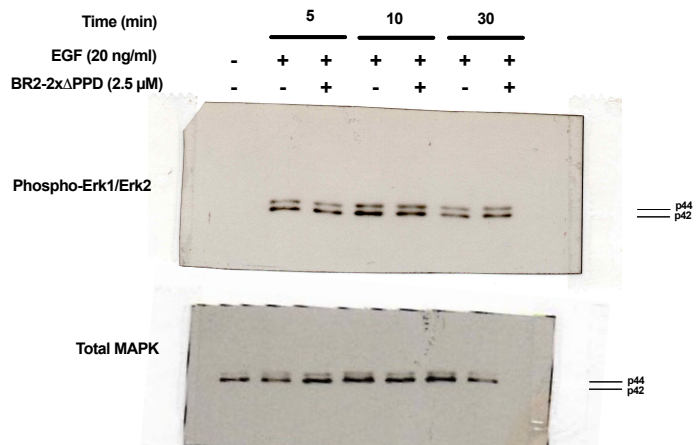

Supplement: pone.0264717.s002.pdf [file pone.0264717.s002.pdf]
